# Supplementary material for: Branched hierarchical photoanode of anatase TiO2 nanotubes on rutile TiO2 nanorod arrays for efficient quantum dot-sensitized solar cells
Source: Royal Society of Chemistry journal article supplement (doi:10.1039/c4ta06433j), 2015-01-01
Supplement: c4ta06433j1.pdf [file c4ta06433j1.pdf]

## Supporting Information

### **Branched hierarchical photoanode of anatase TiO<sub>2</sub> nanotubes on rutile TiO<sub>2</sub> nanorod arrays for efficient quantum dot-sensitized solar cells**

Bingkun Liu,<sup>a</sup> Yanjun Sun,<sup>a</sup> Xuesong Wang,<sup>\*b</sup> Lijing Zhang,<sup>a</sup> Dejun Wang,<sup>a,c</sup> Zewen Fu,<sup>a</sup> Yanhong Lin,<sup>a</sup> and Tengfeng Xie<sup>\*a</sup>

<sup>a</sup> *State Key Laboratory of Theoretical and Computational Chemistry, College of Chemistry, Jilin University, Changchun 130012, People's Republic of China.*

<sup>b</sup> *Huanghe Hydropower Photovoltaic Industry Technology Co.,Ltd, Xi'an 710000, People's Republic of China.*

<sup>c</sup> *Department of Chemistry, Tsinghua University, Beijing 100084, People's Republic of China.*

<sup>\*</sup>Corresponding author: xietf@jlu.edu.cn and cpiwxs@126.com.

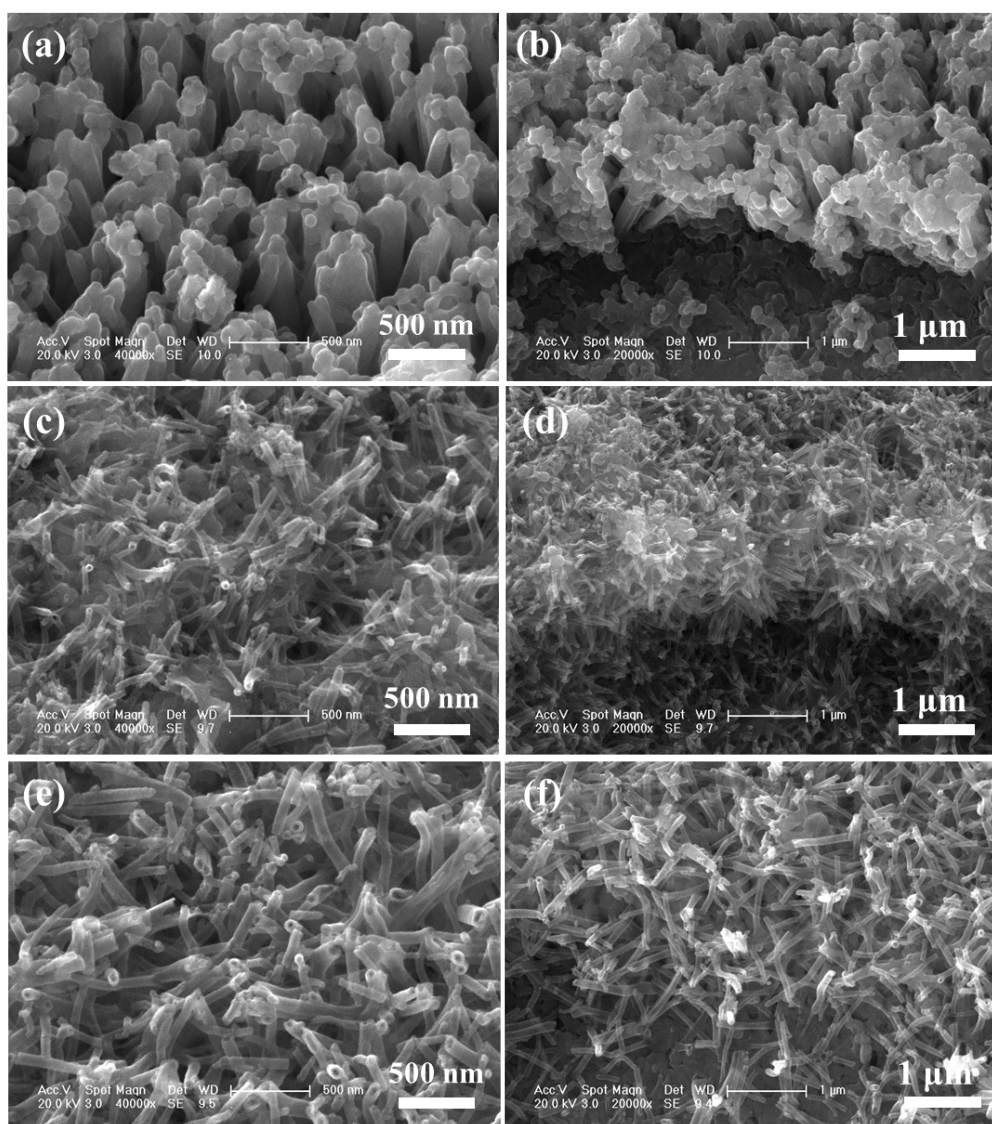

**Fig. S1.** FESEM images of top view and cross-sectional view of H-TiO<sub>2</sub> NRAs with different hydrothermal growth of ZnO nanorod templates for 1 h (a,b), 4 h (c,d) and 6 h (e,f).

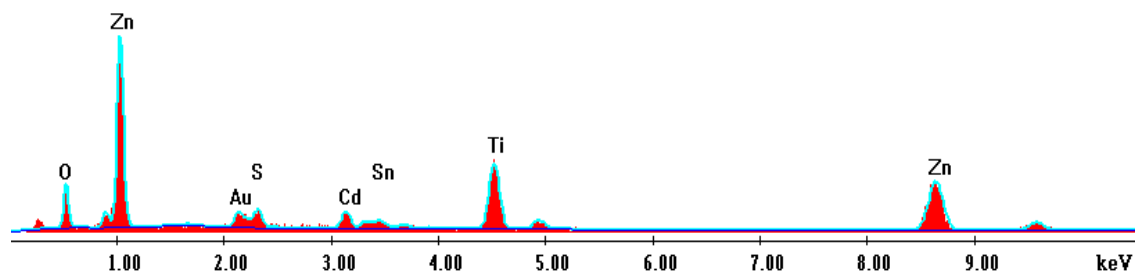

**Fig. S2.** EDX spectrum of CdS QD-sensitized branched ZnO/TiO<sub>2</sub> NRAs.

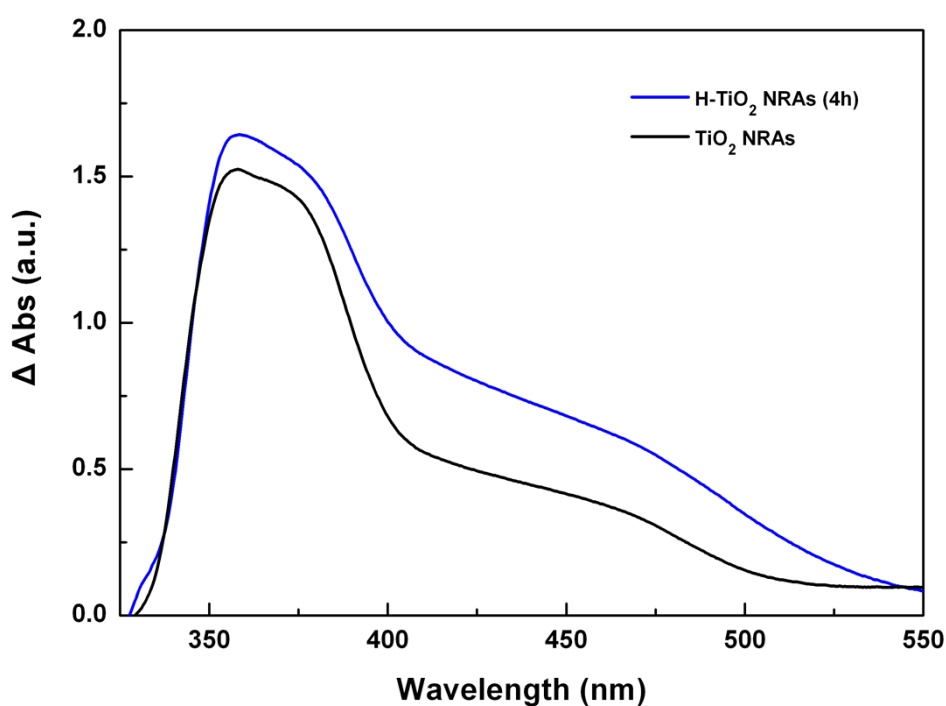

**Fig. S3.** The optical absorbance of CdS QDs at different electrodes.

By subtracting the electrode effect from QDs-sensitized TiO<sub>2</sub> samples (From Figure 4 in main manuscript), we can deduce the optical absorbance value of only CdS QDs ( $\Delta$  Abs). From Figure S3, high absorbance value has been observed at H-TiO<sub>2</sub> NRAs, which indicates that higher loading of QDs in this electrode compare to TiO<sub>2</sub> NR electrode.

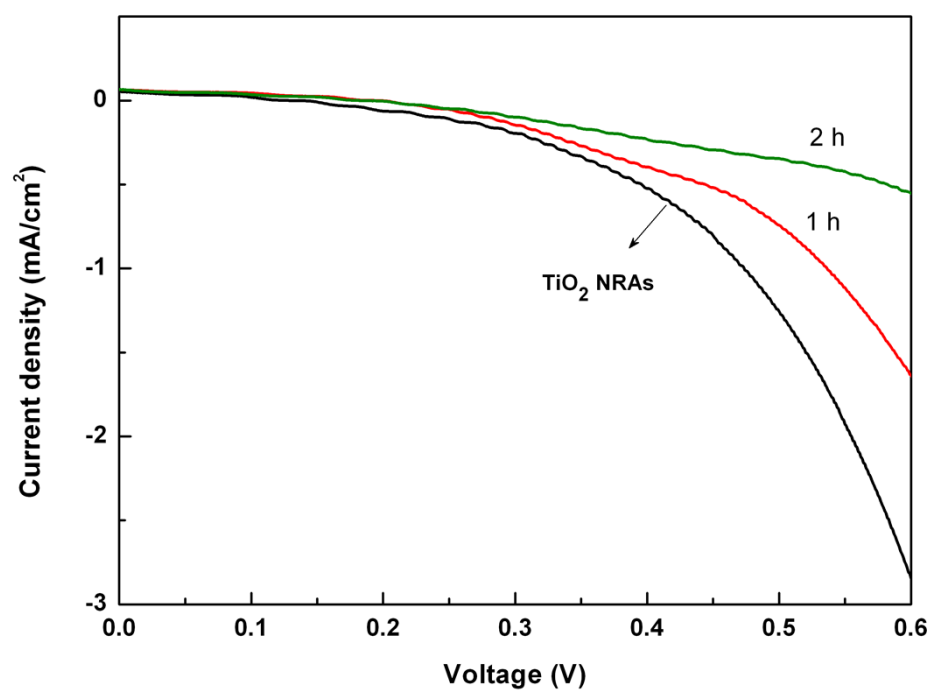

**Fig. S4.** Dark current-voltage curves of QDSCs assembled with TiO<sub>2</sub> NRAs and H-TiO<sub>2</sub> NRAs with various time.

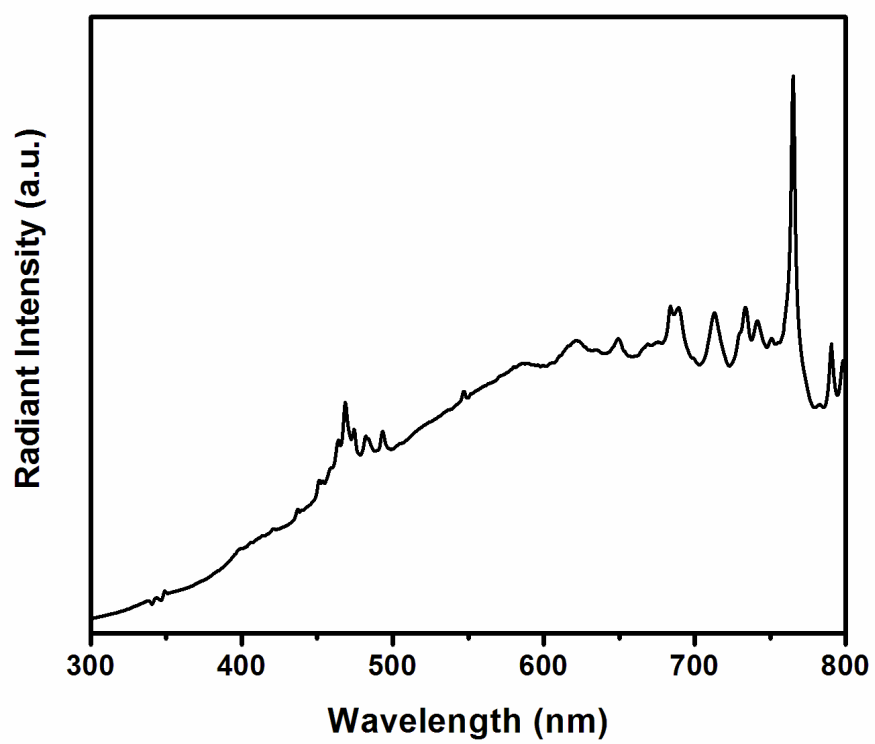

**Fig. S5.** The spectrum of Xe lamp used in our experiments.
